# Supplementary material
Source: MDPI journal article supplement (https://www.mdpi.com/2073-4441/13/23/3431)
Supplement: s1 [file s1]

Supplementary Information

# On the Understanding of the Hydrodynamics and the Causes of Saltwater Intrusion on Lagoon Tidal Springs

Roger Pacheco-Castro <sup>1,2,3</sup>, Paulo Salles <sup>2,3,\*</sup>, Cesar Canul-Macario <sup>2</sup> and Alejandro Paladio-Hernandez <sup>2</sup>

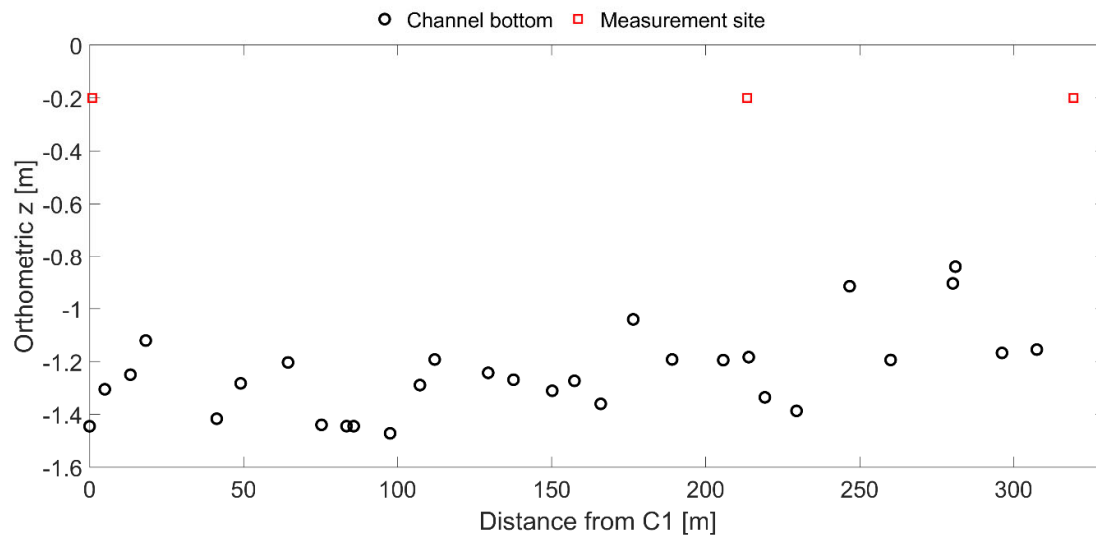

**Figure S1.** Elevations of points along the Peten channel bottom. The elevation was measured at the middle section approximately. The red squares show the location of the three measurements sites (C1, C2, and C3).

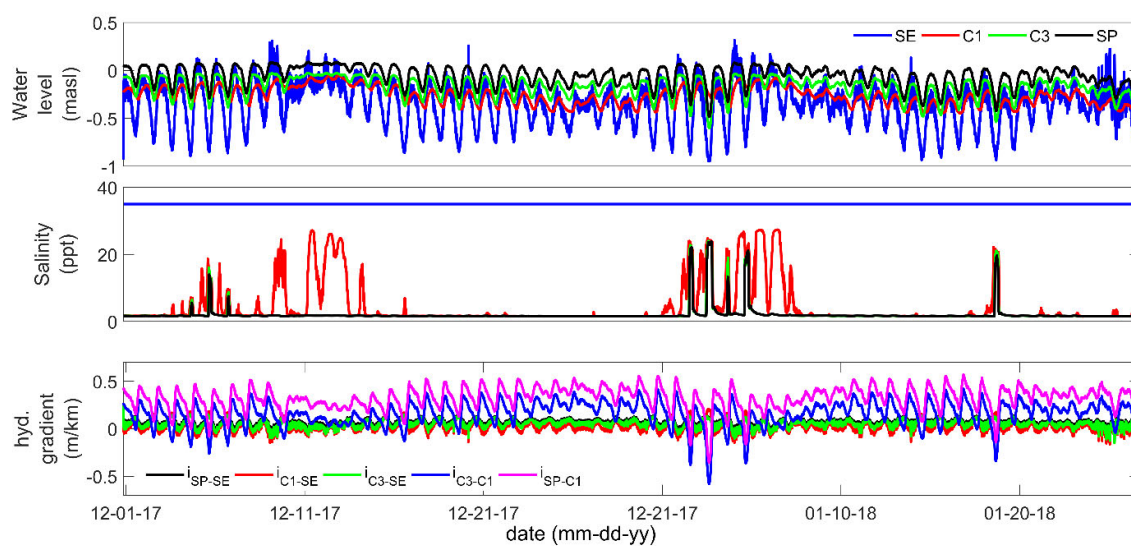

**Figure S2.** Water levels, salinity measurements at SE, C1, C3, and SP, and the hydraulic gradient between SE, C1, C3, and SP.
